# Supplementary material for: A study on the conversion of glycerol to pyridine bases over Cu/HZSM-5 catalysts
Source: Royal Society of Chemistry journal article supplement (doi:10.1039/c6gc00038j), 2016-01-01
Supplement: c6gc00038j3.pdf [file c6gc00038j3.pdf]

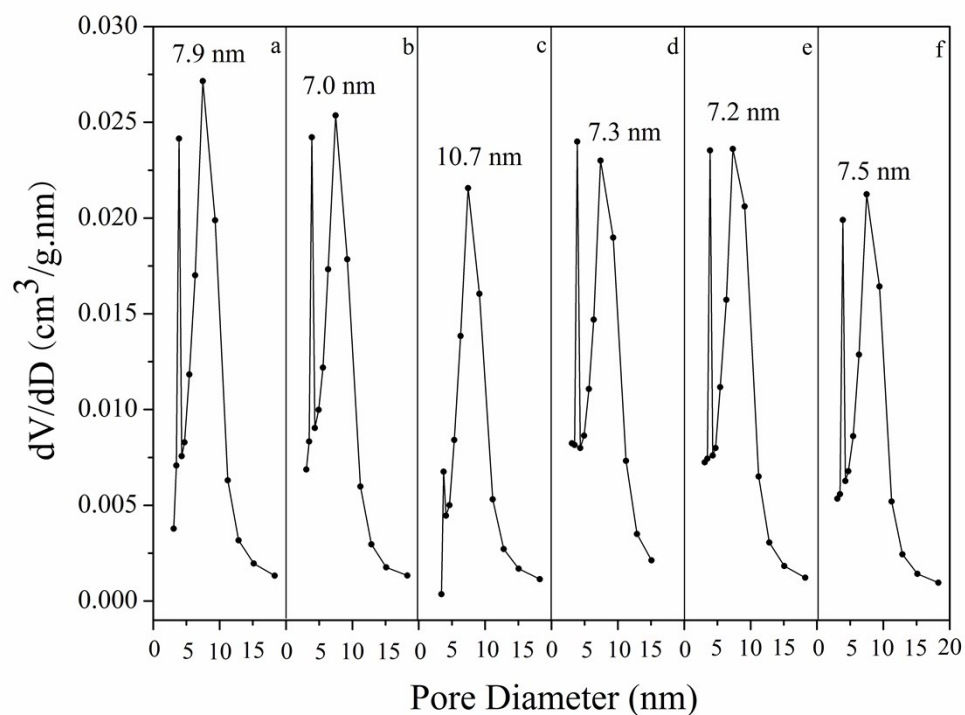

**Fig. S3** Pore size distribution curves as a function of pore diameter. (a) HZSM-5(38); (b) 4.6%Cu/HZSM-5(38) (Fresh); (c) 4.6%Cu/HZSM-5(38) (Used); (d) 4.6%Cu/HZSM-5(38) (Regenerated); (e) 2.3%Cu/HZSM-5(38); (f) 15.3%Cu/HZSM-5(38).
