# Supplementary material for: A study on the conversion of glycerol to pyridine bases over Cu/HZSM-5 catalysts
Source: Royal Society of Chemistry journal article supplement (doi:10.1039/c6gc00038j), 2016-01-01
Supplement: c6gc00038j6.pdf [file c6gc00038j6.pdf]

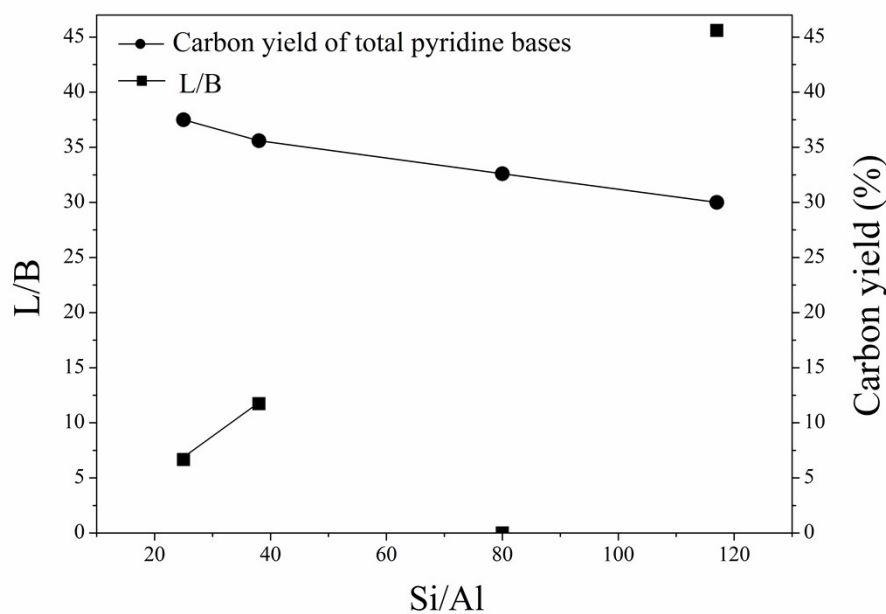

**Fig. S6 (1)** Effects of the Si/Al ratio on the L/B ratio and the performance of the 6.9%Cu/HZSM-5 catalysts.

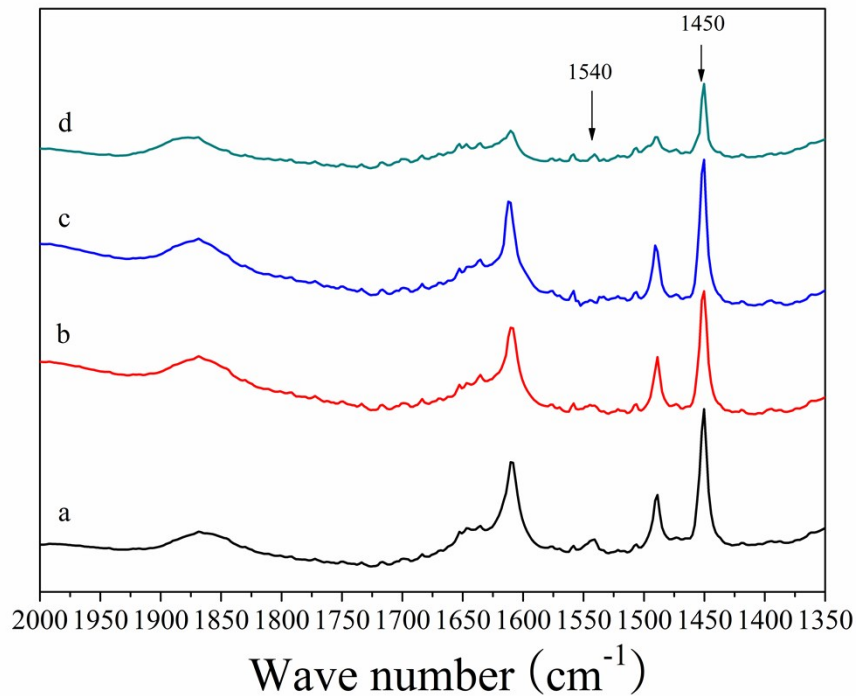

**Fig. S6 (2)** IR spectra of pyridine adsorbed on the catalysts. (a) 6.9%Cu/HZSM-5(25); (b) 6.9%Cu/HZSM-5(38); (c) 6.9%Cu/HZSM-5(80); (d) 6.9%Cu/HZSM-5(117).
