# Supplementary material for: A study on the conversion of glycerol to pyridine bases over Cu/HZSM-5 catalysts
Source: Royal Society of Chemistry journal article supplement (doi:10.1039/c6gc00038j), 2016-01-01
Supplement: c6gc00038j9.pdf [file c6gc00038j9.pdf]

**Table S1** Effects of doped metal on the performance of the HZSM-5(38) based catalysts.

| Entry    | Catalyst                 | Conversion (%) | Carbon yield (%) |            |            |            |            |            |                               |                               |                 | Yield <sup>a</sup> (%) | Yield <sup>b</sup> (%) | CB (%)      |
|----------|--------------------------|----------------|------------------|------------|------------|------------|------------|------------|-------------------------------|-------------------------------|-----------------|------------------------|------------------------|-------------|
|          |                          |                | Pyr              | 2-Pico     | 3-Pico     | AN         | PN         | AA         | C <sub>2</sub> H <sub>4</sub> | C <sub>3</sub> H <sub>6</sub> | CO <sub>2</sub> |                        |                        |             |
| 1        | HZSM-5(38)               | 96.1           | 15.7             | 1.1        | 4.5        | 4.8        | 2.3        | 6.7        | -                             | -                             | 6.1             | 7.1                    | 21.3                   | 41.1        |
| 2        | 9.2%Fe/HZSM-5(38)        | 99.7           | 7.1              | 1.6        | 2.6        | 9.5        | 5.6        | 4.5        | 2.2                           | 1.8                           | 18.2            | 15.1                   | 11.3                   | 52.9        |
| 3        | 9.2%Co/HZSM-5(38)        | 98.2           | 12.9             | 2.9        | 2.5        | 12.3       | 3.0        | 5.1        | 3.5                           | 3.5                           | 13.4            | 15.3                   | 18.3                   | 58.9        |
| 4        | 9.2%Ni/HZSM-5(38)        | 97.6           | 15.1             | 1.8        | 3.5        | 10.9       | 2.5        | 5.7        | 2.5                           | 2.8                           | 16.8            | 13.4                   | 20.4                   | 61.7        |
| <b>5</b> | <b>9.2%Cu/HZSM-5(38)</b> | <b>99.8</b>    | <b>22.3</b>      | <b>1.0</b> | <b>3.8</b> | <b>4.8</b> | <b>0.9</b> | <b>7.6</b> | <b>2.7</b>                    | <b>2.1</b>                    | <b>12.9</b>     | <b>5.7</b>             | <b>27.1</b>            | <b>58.1</b> |
| 6        | 9.2%Zn/HZSM-5(38)        | 100.0          | 8.4              | 3.3        | 2.0        | 11.0       | 4.3        | 6.1        | 3.5                           | 2.9                           | 17.7            | 15.3                   | 13.7                   | 59.2        |
| 7        | 9.2%Cr/HZSM-5(38)        | 100.0          | 11.3             | 1.2        | 1.9        | 13.9       | 3.8        | 4.1        | 3.3                           | 4.3                           | 20.2            | 17.7                   | 14.4                   | 64.0        |

Pyr: pyridine; 2-Pico: 2-picoline; 3-Pico: 3-picoline; AN: acetonitrile; PN: propionitrile; AA: acetaldehyde; CB: carbon balance.

Reaction conditions: reaction temperature 500°C, ammonia/glycerol molar ratio 3:1, atmospheric pressure, GHSV 300 h<sup>-1</sup>, time on stream 2–4 h. 20 wt% glycerol aqueous solution 0.06 ml/min, NH<sub>3</sub> 9.2 ml/min.

<sup>a</sup> Total carbon yield of acetonitrile and propionitrile.

<sup>b</sup> Total carbon yield of pyridine, 2-picoline and 3-picoline.
