# Supplementary material for: A study on the conversion of glycerol to pyridine bases over Cu/HZSM-5 catalysts
Source: Royal Society of Chemistry journal article supplement (doi:10.1039/c6gc00038j), 2016-01-01
Supplement: c6gc00038j12.pdf [file c6gc00038j12.pdf]

**Table S4** Catalytic results of speculated intermediates over the 4.6%Cu/HZSM-5(38) catalyst.

| Entry | Reactants                                   | Conversion (%) | Carbon yield (%) <sup>e</sup> |        |        |      |      |     |                               |                               |                 |
|-------|---------------------------------------------|----------------|-------------------------------|--------|--------|------|------|-----|-------------------------------|-------------------------------|-----------------|
|       |                                             |                | Pyr                           | 2-Pico | 3-Pico | AN   | PN   | AA  | C <sub>2</sub> H <sub>4</sub> | C <sub>3</sub> H <sub>6</sub> | CO <sub>2</sub> |
| 1     | Allyl alcohol                               | 100            | 2.4                           | 2.0    | 16.0   | 4.4  | 10.9 | -   | 5.5                           | 9.9                           | 15.6            |
| 2     | Propionaldehyde <sup>a</sup>                | 100            | 1.6                           | 0.7    | 12.1   | 2.4  | 12.7 | -   | 6.1                           | 15.2                          | 7.9             |
| 3     | Hydroxyacetone                              | 100            | 10.3                          | 1.9    | 1.2    | 11.4 | 2.9  | 0.8 | 1.9                           | 1.1                           | 15.6            |
| 4     | Acetaldehyde                                | 100            | 15.4                          | 1.2    | 1.1    | 29.7 | -    | -   | 5.2                           | 7.4                           | 23.8            |
| 5     | Acetaldehyde + Propionaldehyde <sup>b</sup> | 100            | 4.0                           | 4.0    | 7.1    | 13.5 | 11.3 | -   | 9.0                           | 31.1                          | 6.6             |
| 6     | Acetaldehyde + Propionaldehyde <sup>c</sup> | 100            | 4.8                           | 0.3    | 0.9    | 23.4 | 9.0  | -   | 11.7                          | 17.7                          | 12.5            |
| 7     | Formaldehyde + Acetaldehyde <sup>d</sup>    | 100            | 15.7                          | 0.7    | 1.6    | 16.7 | 1.7  | -   | 1.7                           | 2.0                           | 19.2            |
| 8     | Ethylene                                    | 16.3           | 1.5                           | -      | -      | 3.9  | -    | -   | -                             | -                             | 6.8             |
| 9     | Propylene                                   | 53.2           | 0.4                           | 0.4    | 0.3    | 7.2  | 0.4  | -   | -                             | -                             | 8.5             |

Pyr: pyridine; 2-Pico: 2-picoline; 3-Pico: 3-picoline; AN: acetonitrile; PN: propionitrile; AA: acetaldehyde; CB: carbon balance.

Reaction conditions: catalyst 4.6%Cu/HZSM-5(38) dosage 15 ml, reaction temperature 520°C, atmospheric pressure, ammonia/substrate 7:1, GHSV 300h<sup>-1</sup>, time on stream 2–4 h, aqueous solution of 20 wt% of feed materials.

<sup>a</sup> 15% aqueous solution.

<sup>b</sup> Mixture of aqueous solutions of acetaldehyde (15.0 wt%) and propionaldehyde (19.7 wt%), molar ratio of acetaldehyde/ propionaldehyde 1:1.

<sup>c</sup> Mixture of aqueous solutions of acetaldehyde (15.0 wt%) and propionaldehyde (4.0 wt%), molar ratio of acetaldehyde/ propionaldehyde 5:1.

<sup>d</sup> Mixture of aqueous solutions of formaldehyde (10.2 wt%) and acetaldehyde (15.0 wt%), molar ratio of formaldehyde/acetaldehyde 1:1.

<sup>e</sup> Overall carbon yield of pyridine, 2-picoline, 3-picoline, acetonitrile, propionitrile, ethylene, propylene and carbon dioxide is based on acetaldehyde in entry 4, 5, 6 and 7.
