# Supplementary material for: A study on the conversion of glycerol to pyridine bases over Cu/HZSM-5 catalysts
Source: Royal Society of Chemistry journal article supplement (doi:10.1039/c6gc00038j), 2016-01-01
Supplement: c6gc00038j13.pdf [file c6gc00038j13.pdf]

**Table S5** Comparative catalytic results of fresh and pre-reduced 4.6%Cu/HZSM-5(38).

| Entry | Catalyst                       | Conversion (%) | Carbon yield (%) |        |        |     |     |     |                               |                               |                 | Yield <sup>a</sup> (%) | Yield <sup>b</sup> (%) | CB (%) |
|-------|--------------------------------|----------------|------------------|--------|--------|-----|-----|-----|-------------------------------|-------------------------------|-----------------|------------------------|------------------------|--------|
|       |                                |                | Pyr              | 2-Pico | 3-Pico | AN  | PN  | AA  | C <sub>2</sub> H <sub>4</sub> | C <sub>3</sub> H <sub>6</sub> | CO <sub>2</sub> |                        |                        |        |
| 1     | 4.6%Cu/HZSM-5(38)              | 99.8           | 34.9             | 2.0    | 5.9    | 7.3 | 1.4 | 1.3 | 3.2                           | 2.1                           | 12.7            | 8.7                    | 42.8                   | 70.8   |
| 2     | 4.6%Cu/HZSM-5(38) <sup>c</sup> | 100.0          | 34.4             | 2.2    | 6.6    | 6.6 | 1.7 | 1.7 | 3.3                           | 2.0                           | 12.5            | 8.3                    | 43.2                   | 71.0   |

Pyr: pyridine; 2-Pico: 2-picoline; 3-Pico: 3-picoline; AN: acetonitrile; PN: propionitrile; AA: acetaldehyde; CB: carbon balance.

Reaction conditions: reaction temperature 520°C, ammonia/glycerol molar ratio 7:1, atmospheric pressure, GHSV 300 h<sup>-1</sup>, time on stream 2–4 h. 20 wt% glycerol aqueous solution 0.05 ml/min, NH<sub>3</sub> 18 ml/min.

<sup>a</sup> Total carbon yield of acetonitrile and propionitrile.

<sup>b</sup> Total carbon yield of pyridine, 2-picoline and 3-picoline.

<sup>c</sup> The catalyst was on hydrogen stream 2 h before catalytic run, H<sub>2</sub> velocity 18 ml/min.
