# Supplementary figures and images for: A study on the conversion of glycerol to pyridine bases over Cu/HZSM-5 catalysts
Source: Royal Society of Chemistry journal article supplement (doi:10.1039/c6gc00038j), 2016-01-01

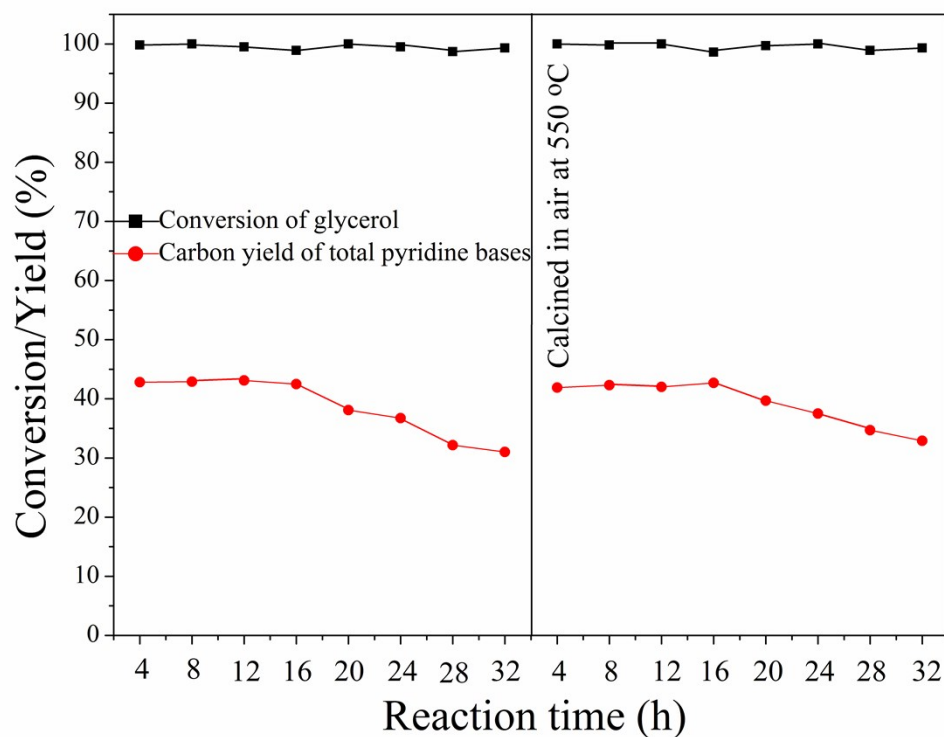

**Fig. S1** Glycerol conversion and total yield of pyridine bases as functions of reaction time.

Supplement: c6gc00038j1.pdf [file c6gc00038j1.pdf]

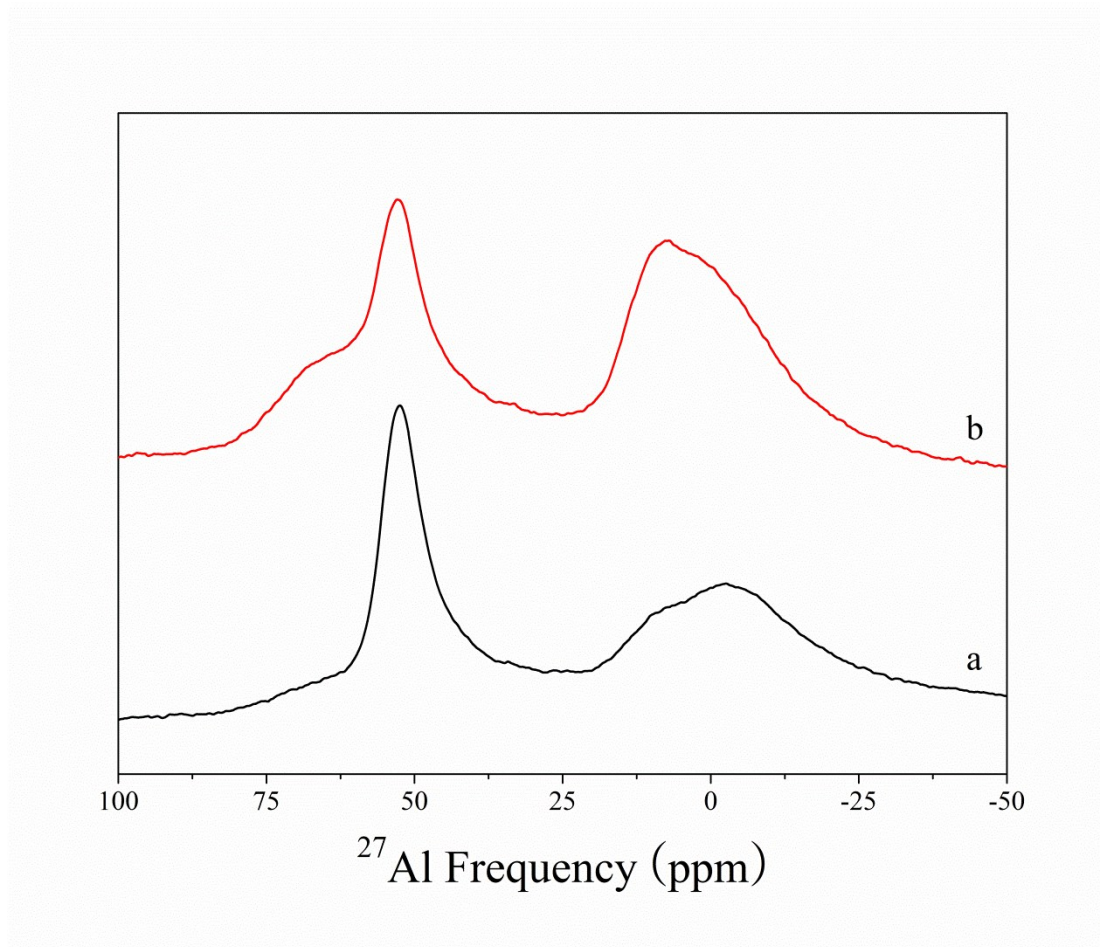

**Fig. S8**  $^{27}\text{Al}$ -MAS-NMR spectra of the Cu/HZSM-5 zeolites samples. (a) 4.6%Cu/HZSM-5(38) (Fresh); (b) 4.6%Cu/HZSM-5(38) (Regenerated).

Supplement: c6gc00038j8.pdf [file c6gc00038j8.pdf]
